# Supplementary material for: Metabolomic analysis reveals a protective effect of Fu-Fang-Jin-Qian-Chao herbal granules on oxalate-induced kidney injury
Source: PubMed Central journal article supplement (PMC6386768; doi:10.1042/bsr20181833), 2019-02-22
Supplement: bsr-39-bsr20181833_Supp1.pdf [file bsr-39-bsr20181833_Supp1.pdf]

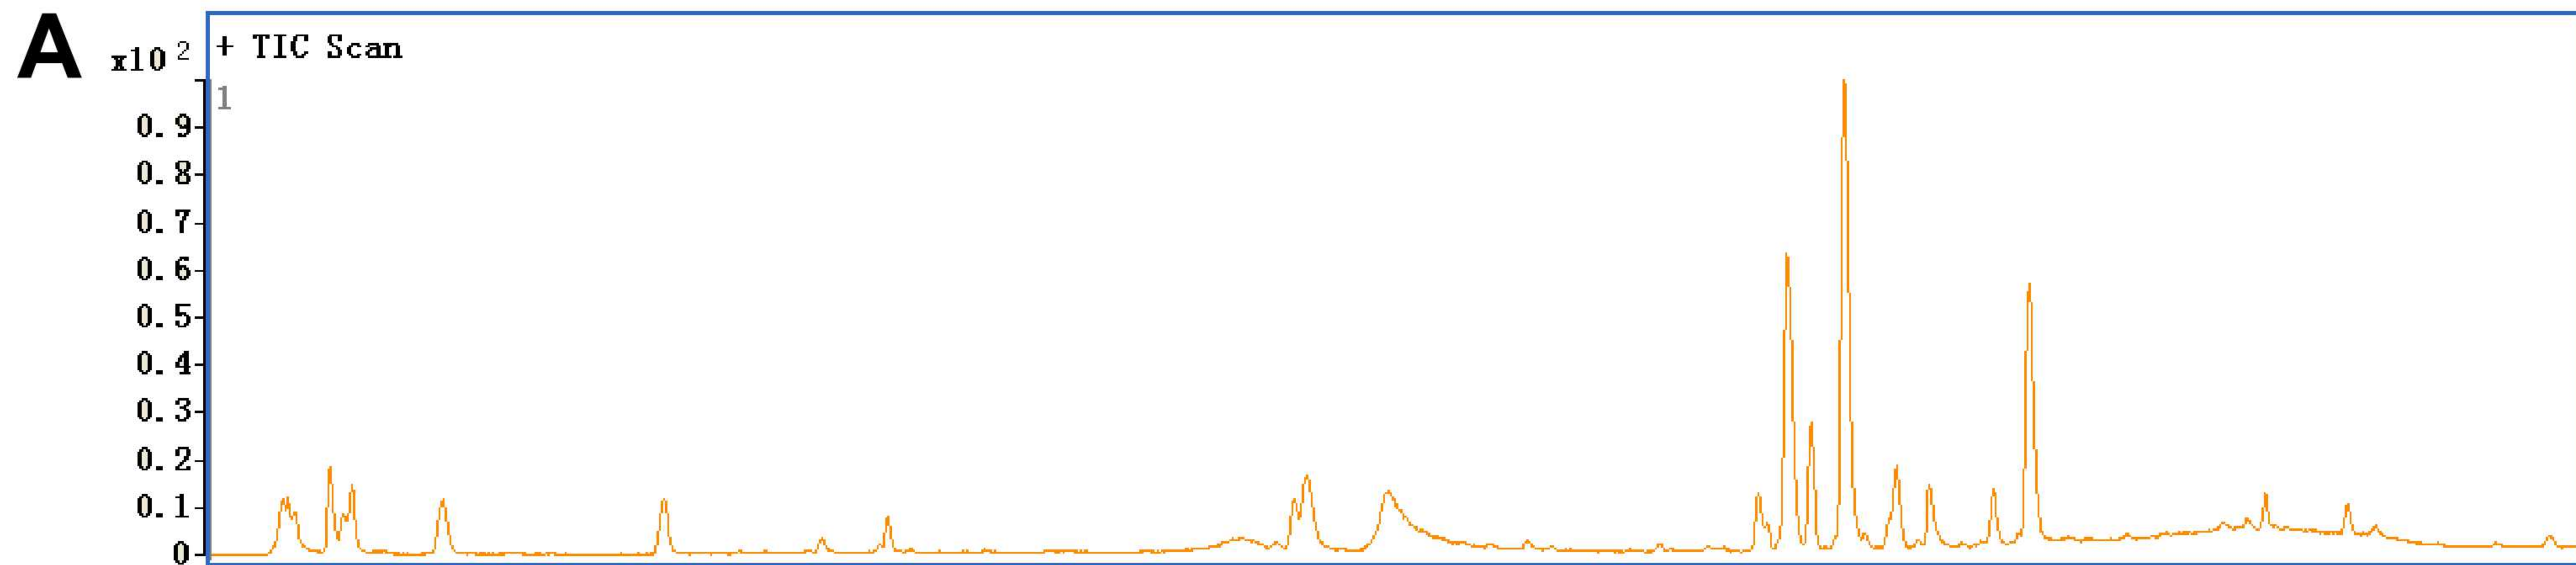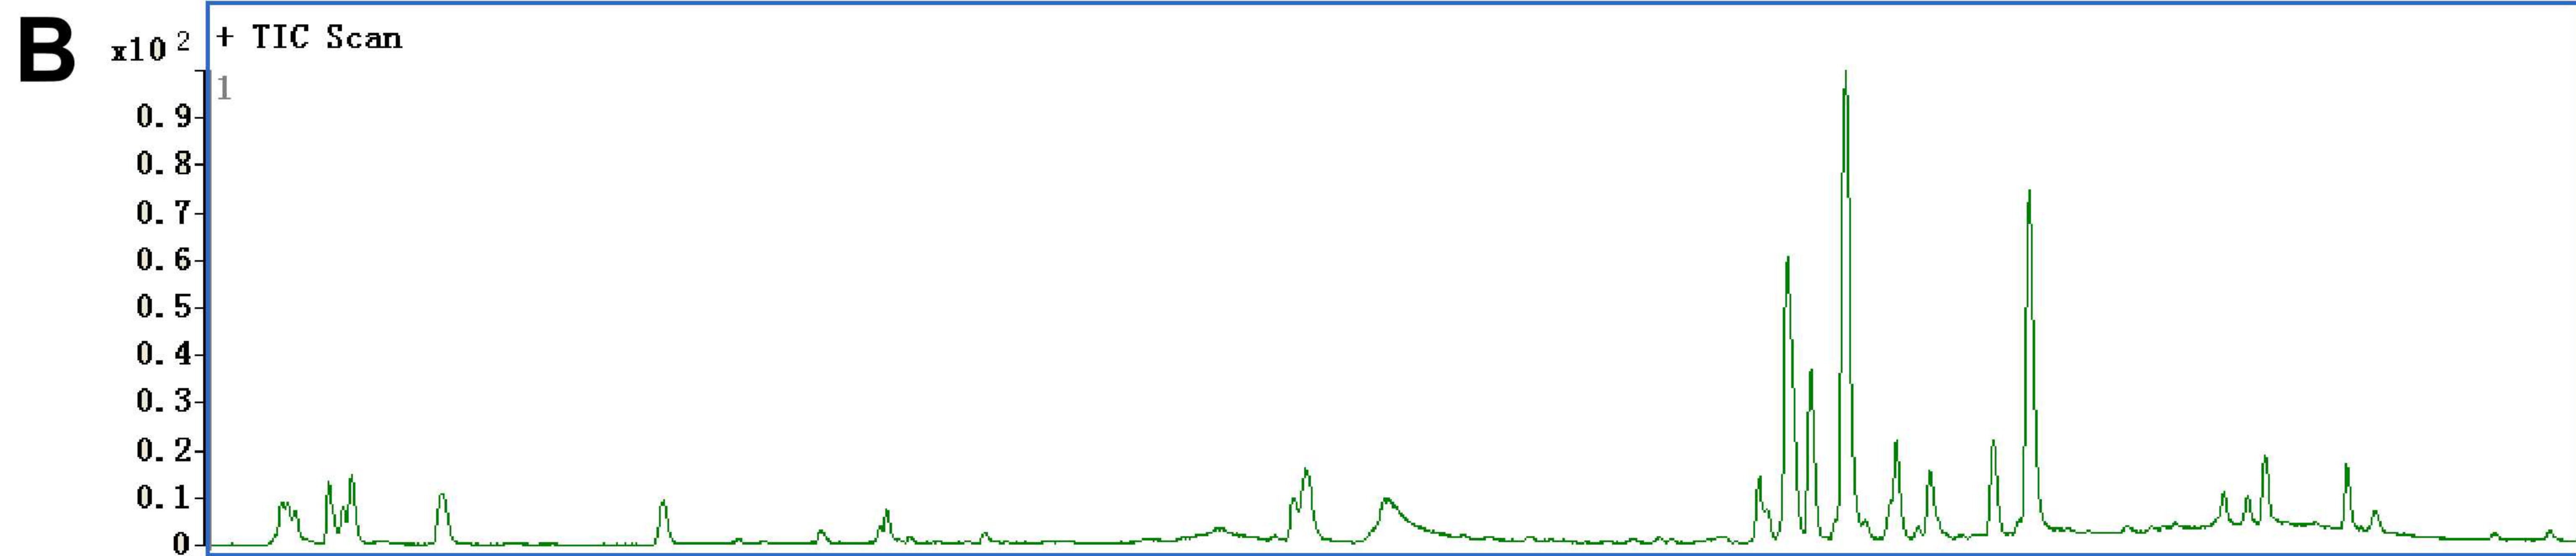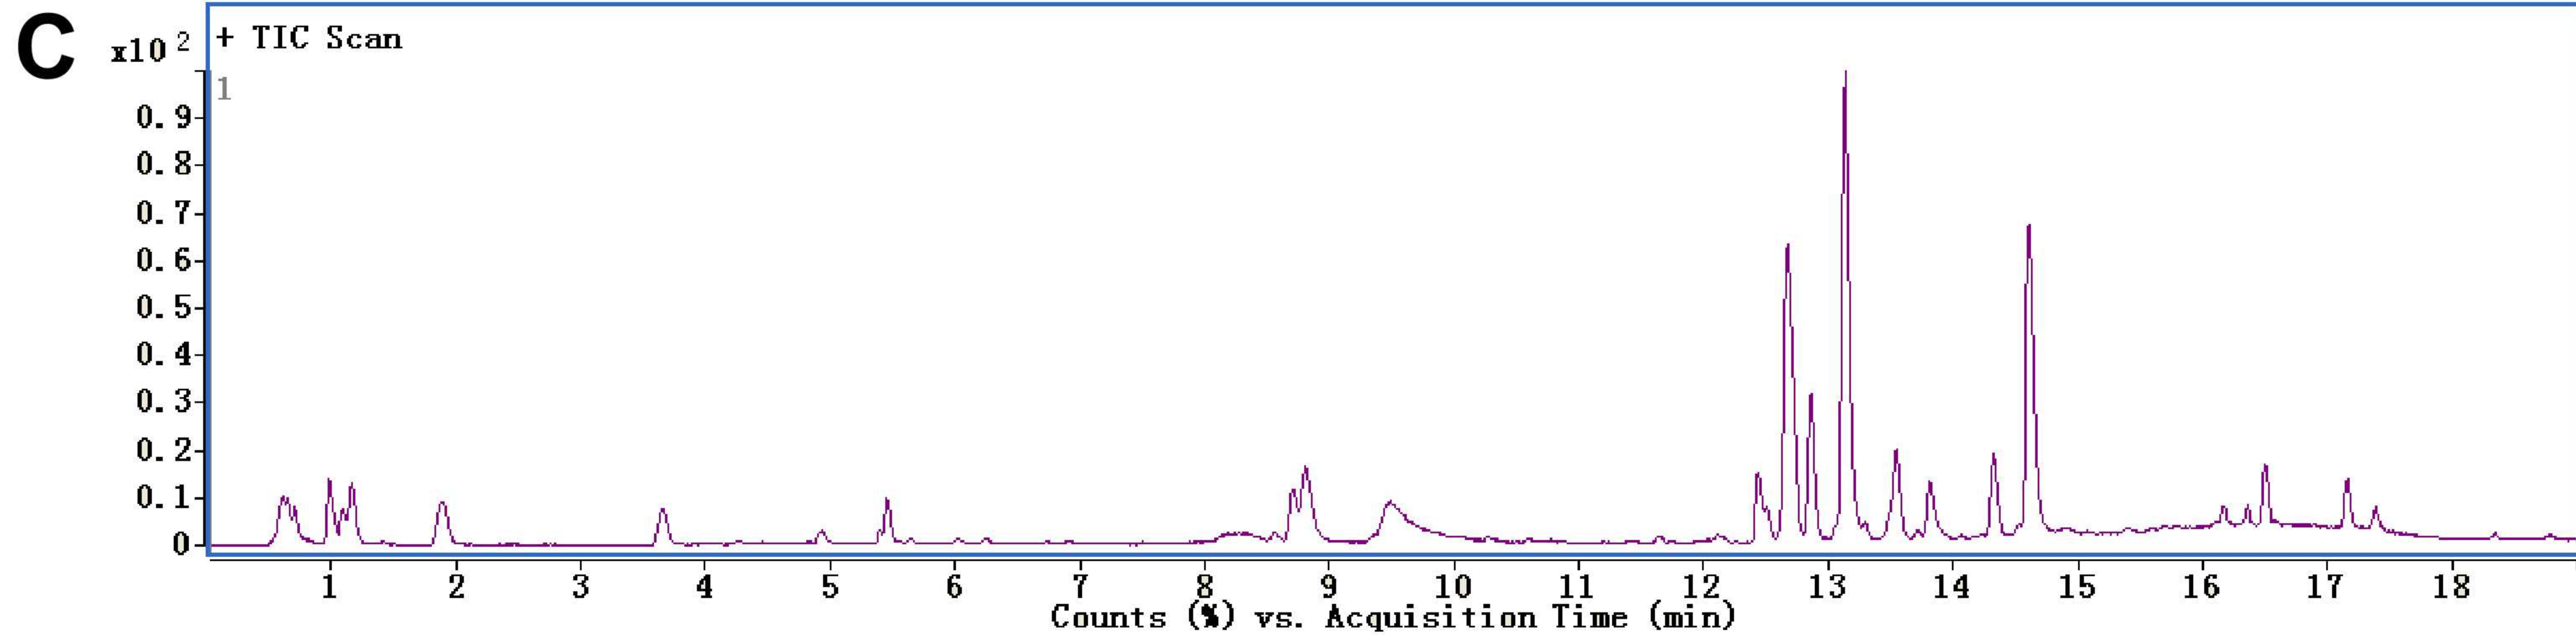

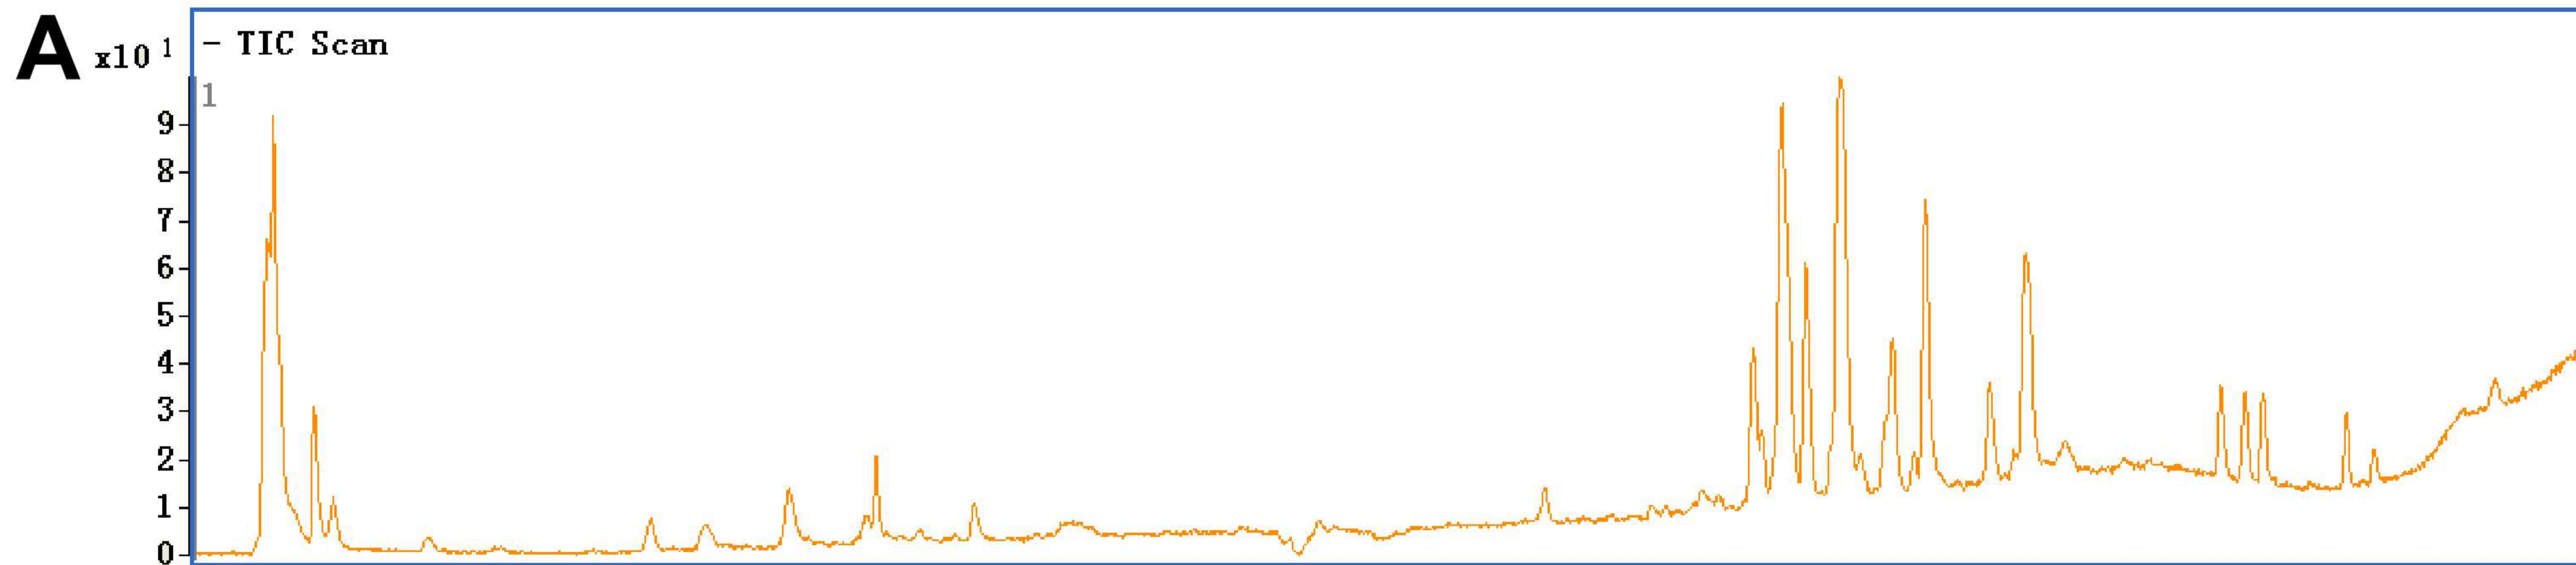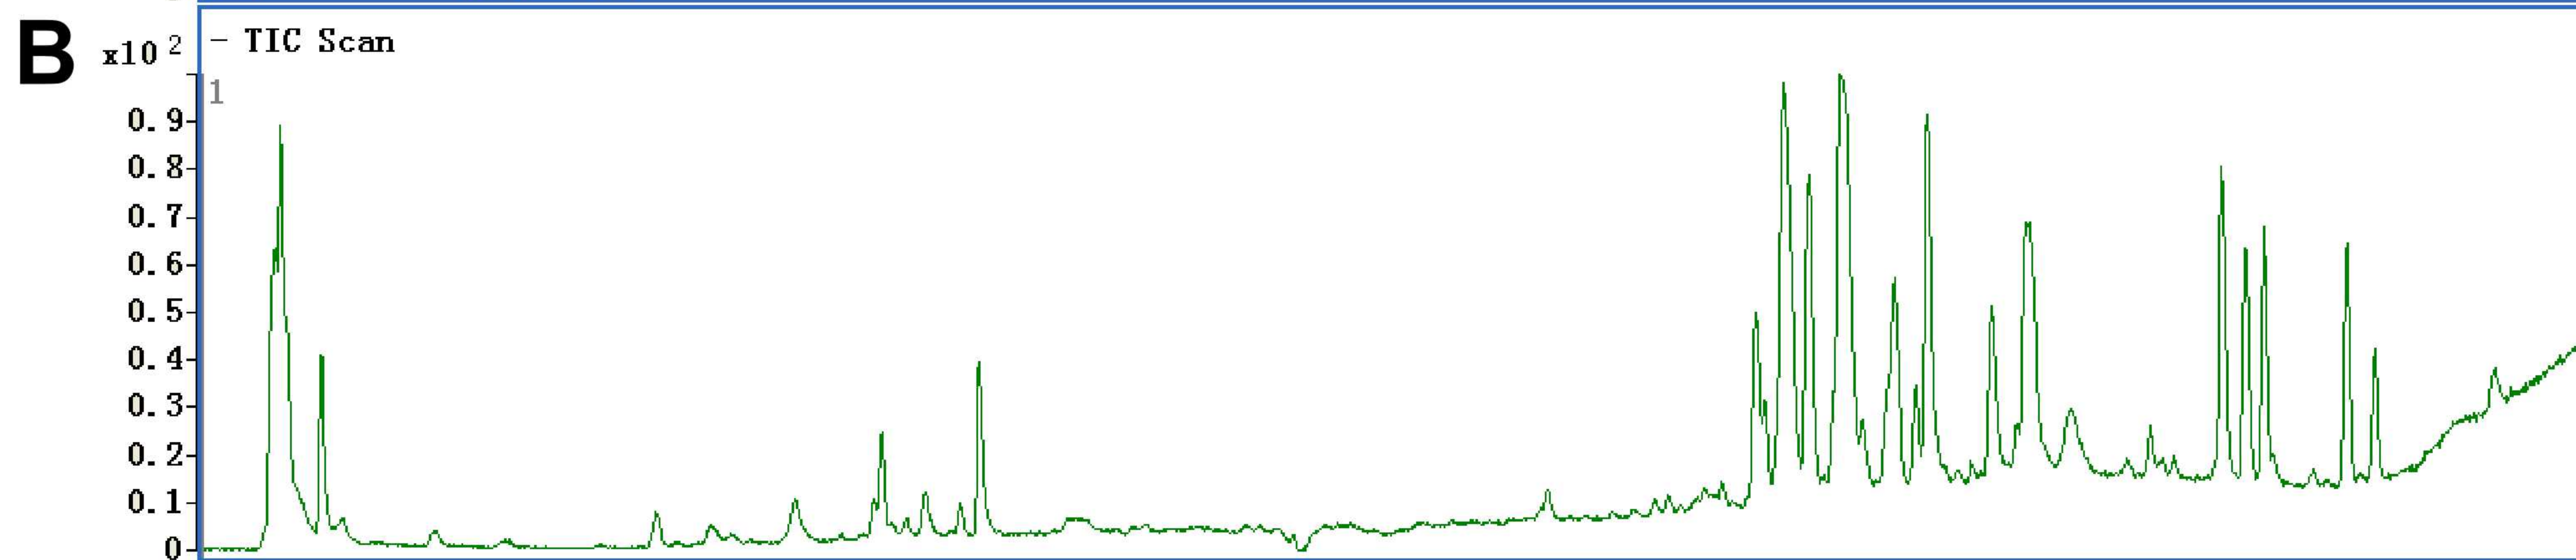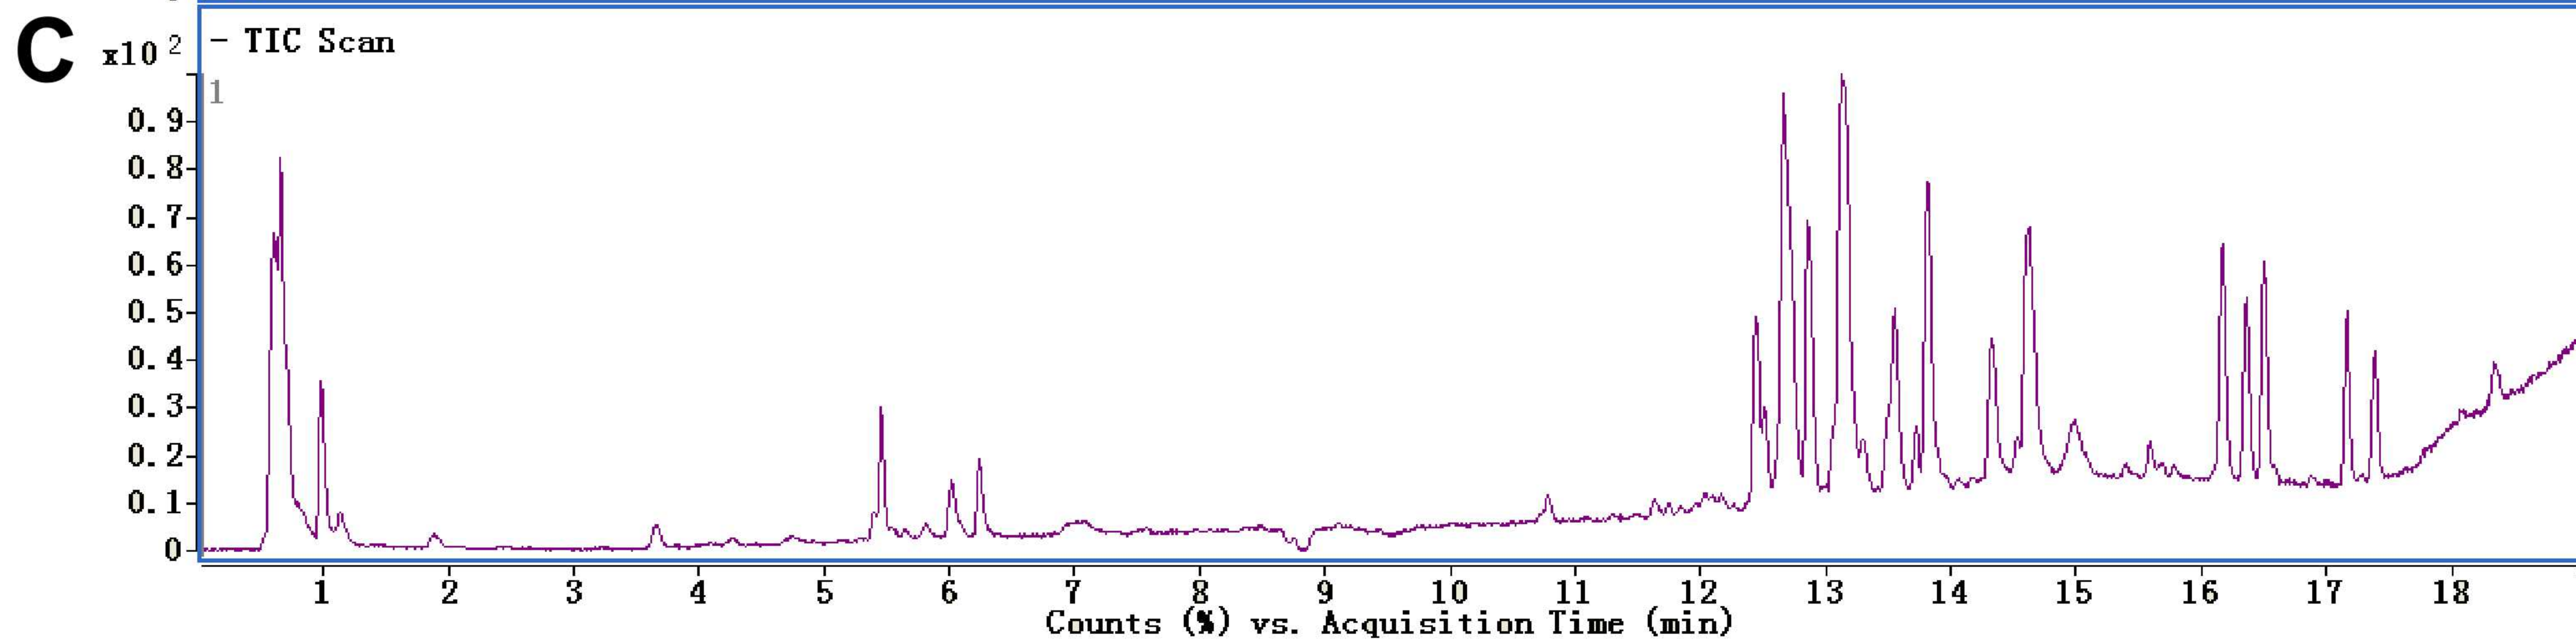

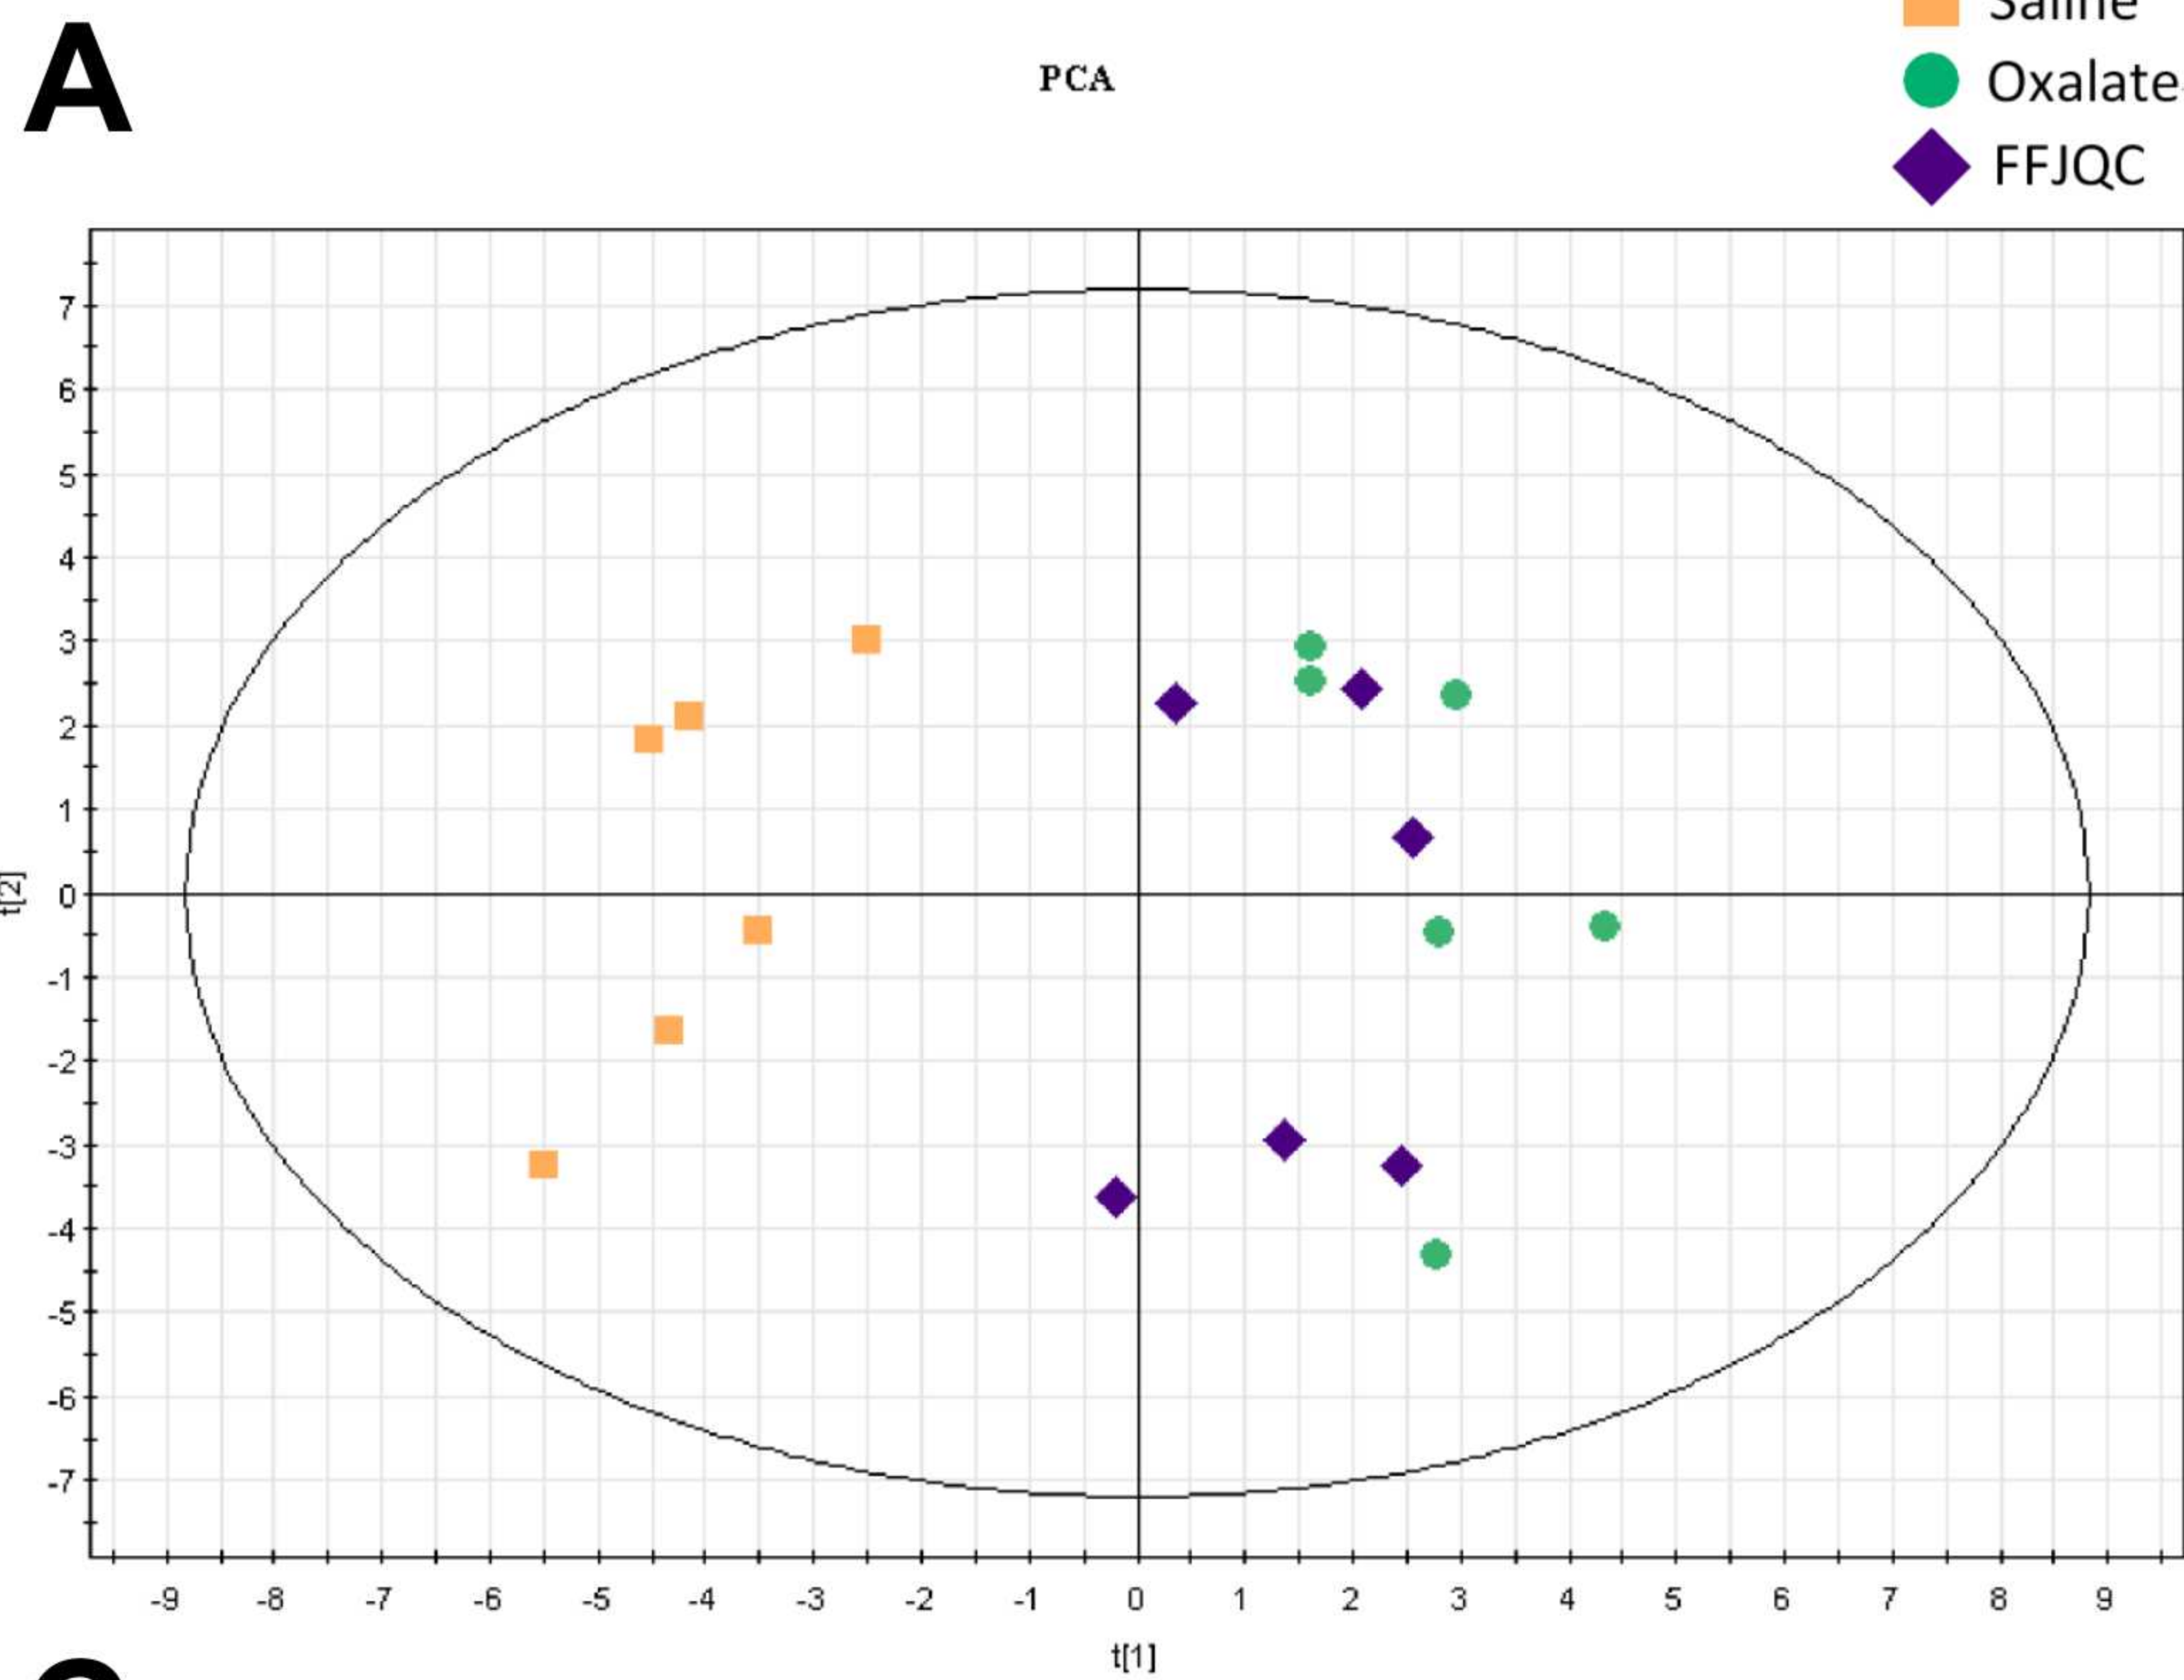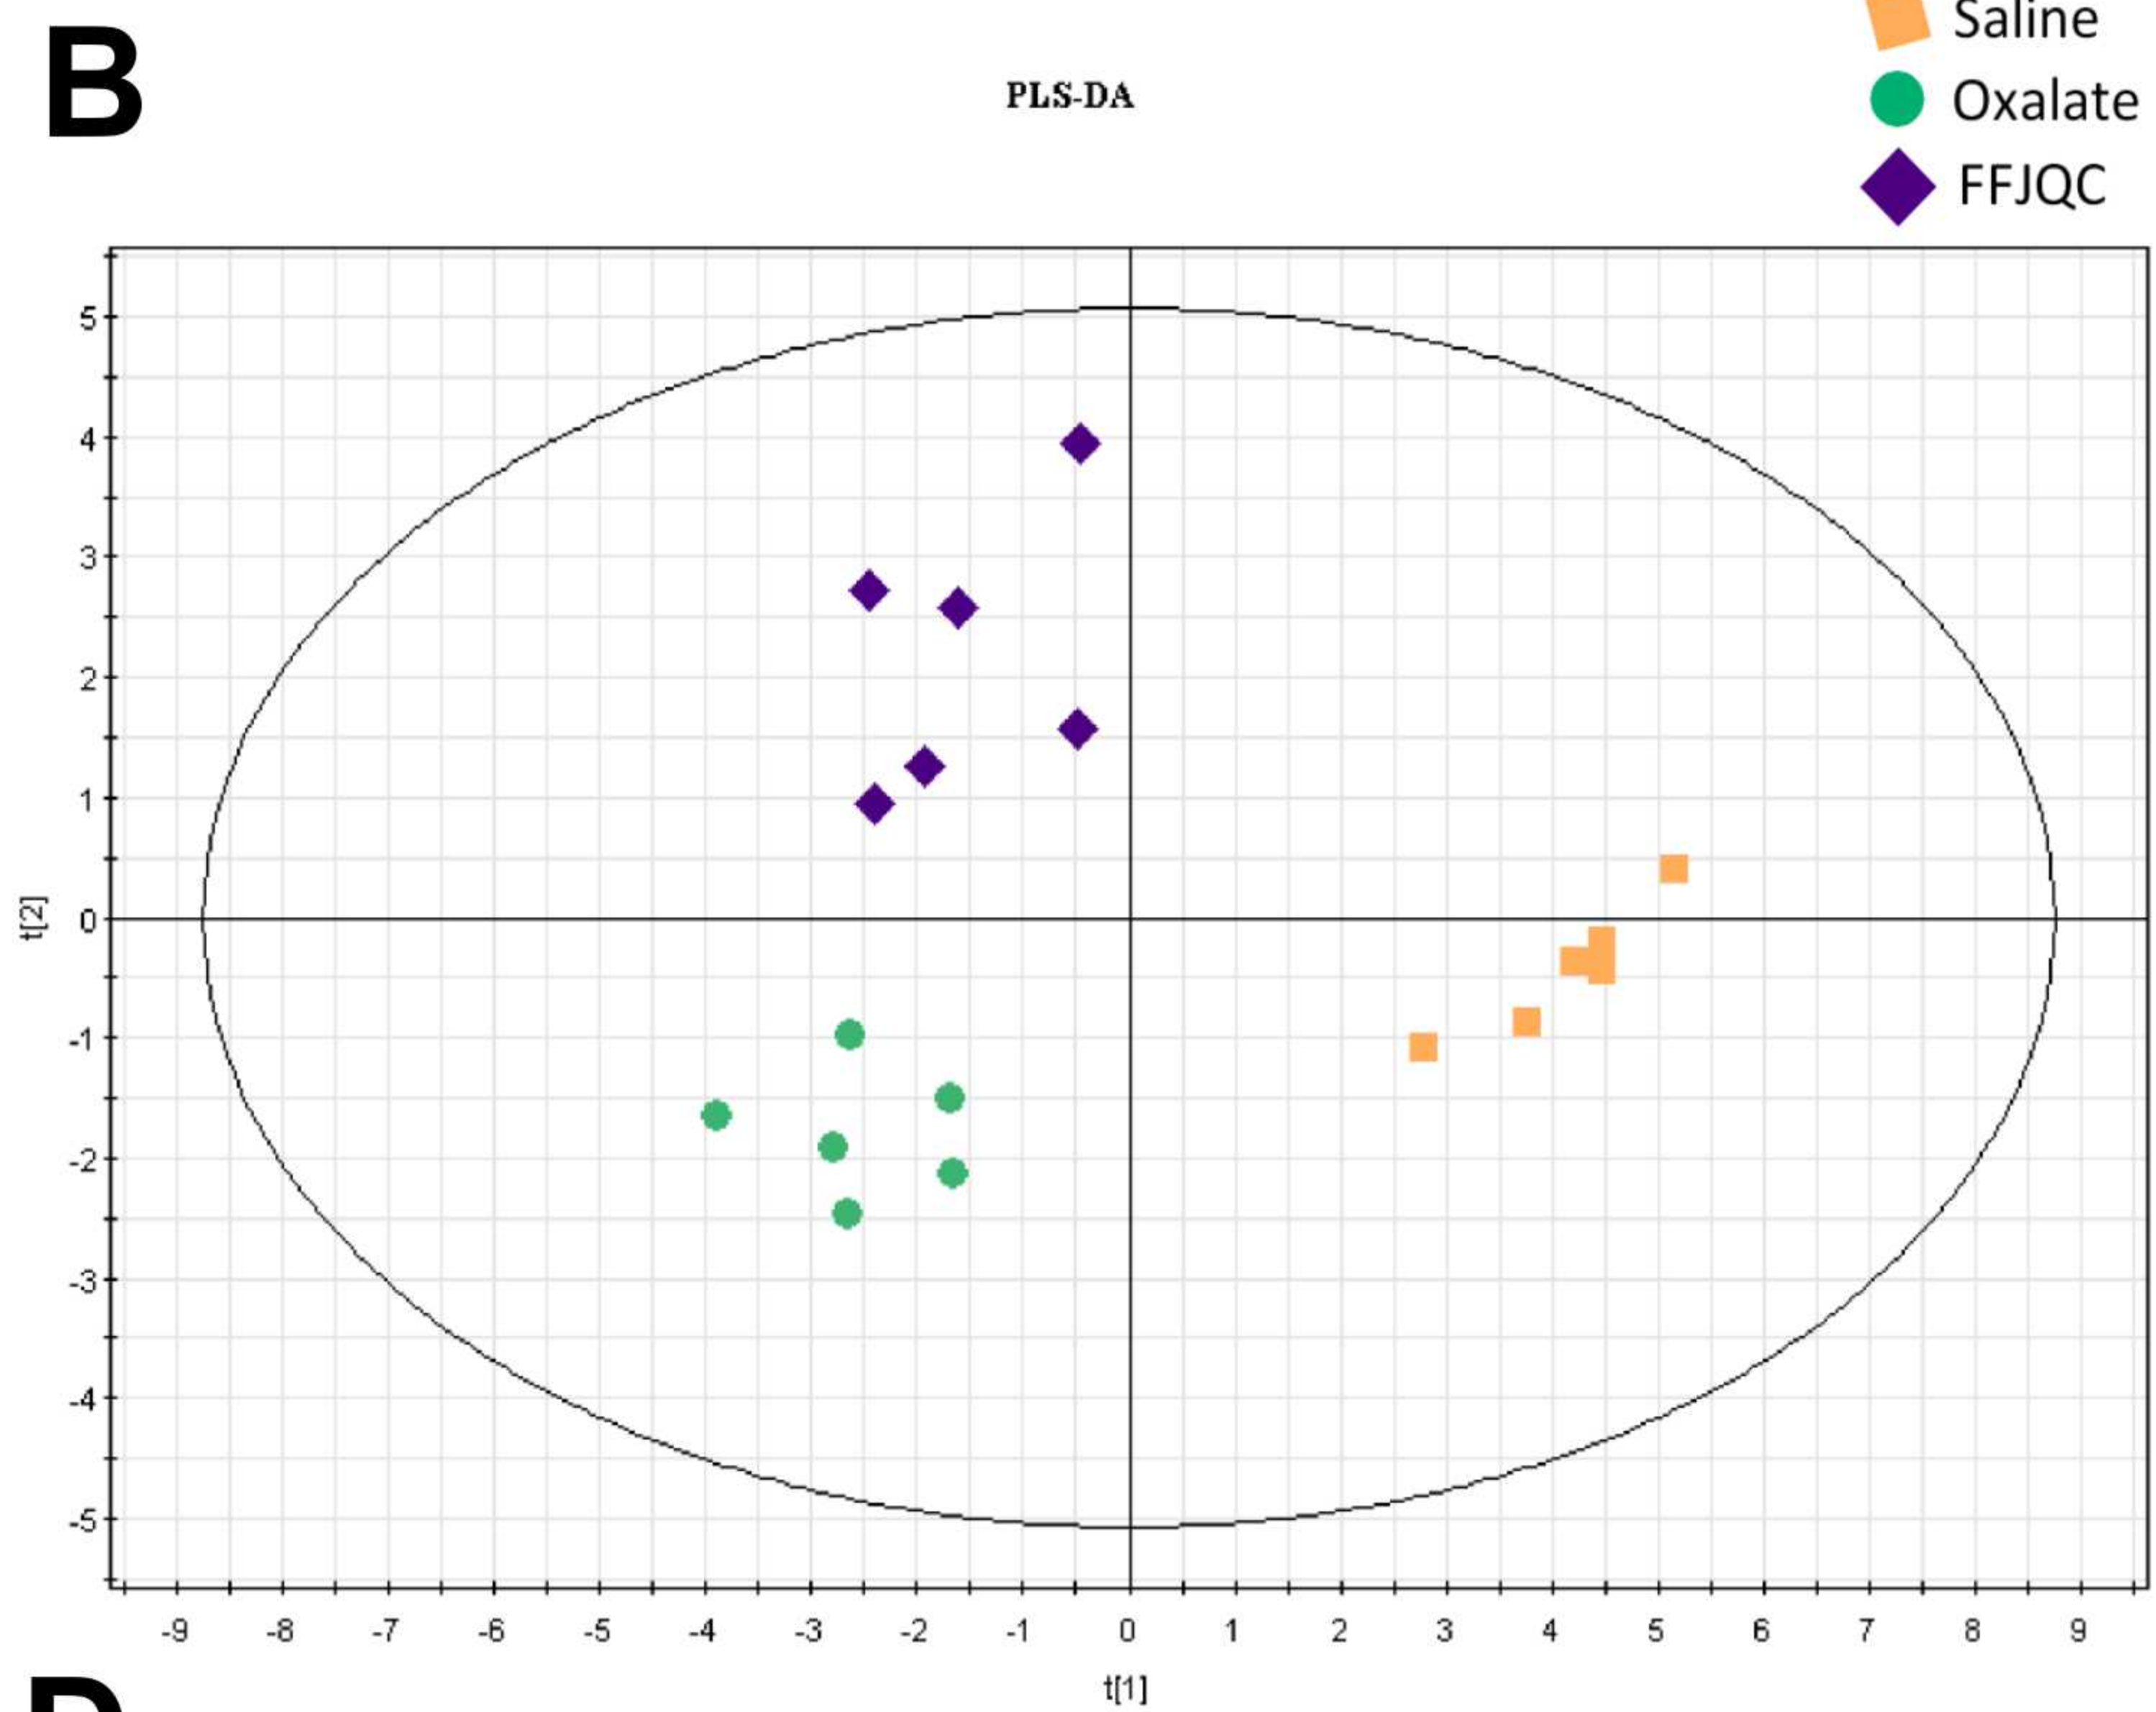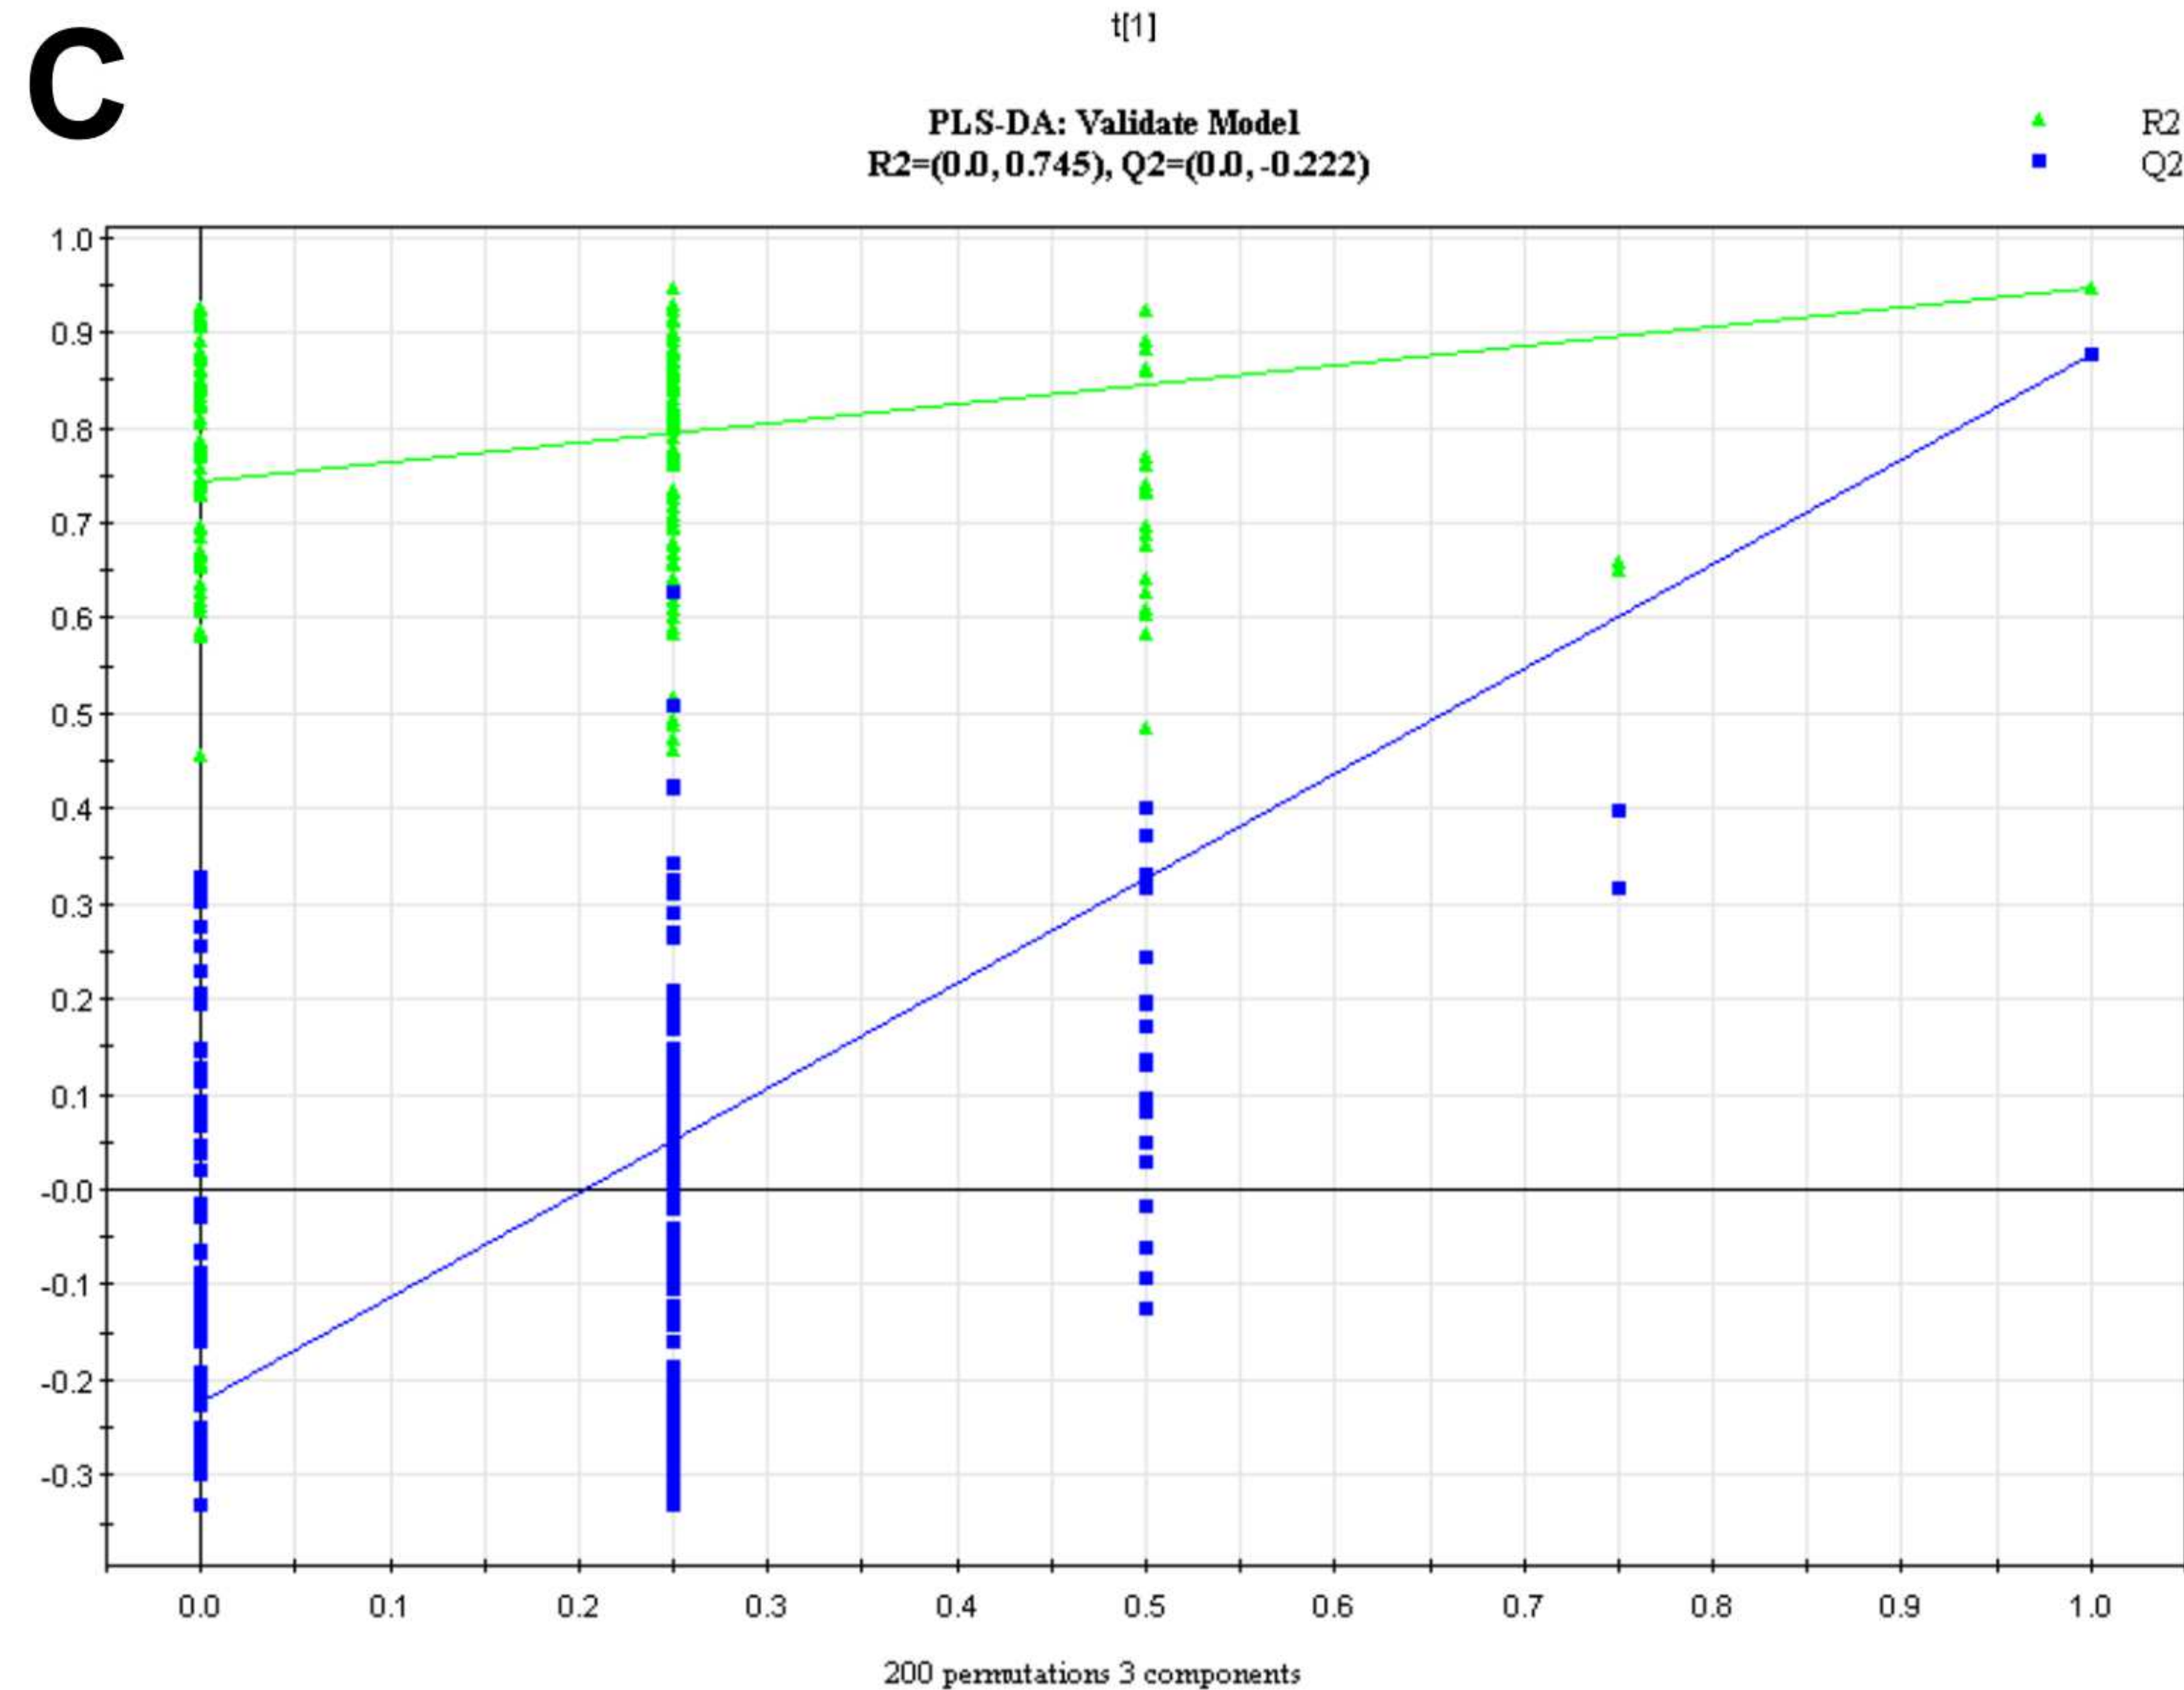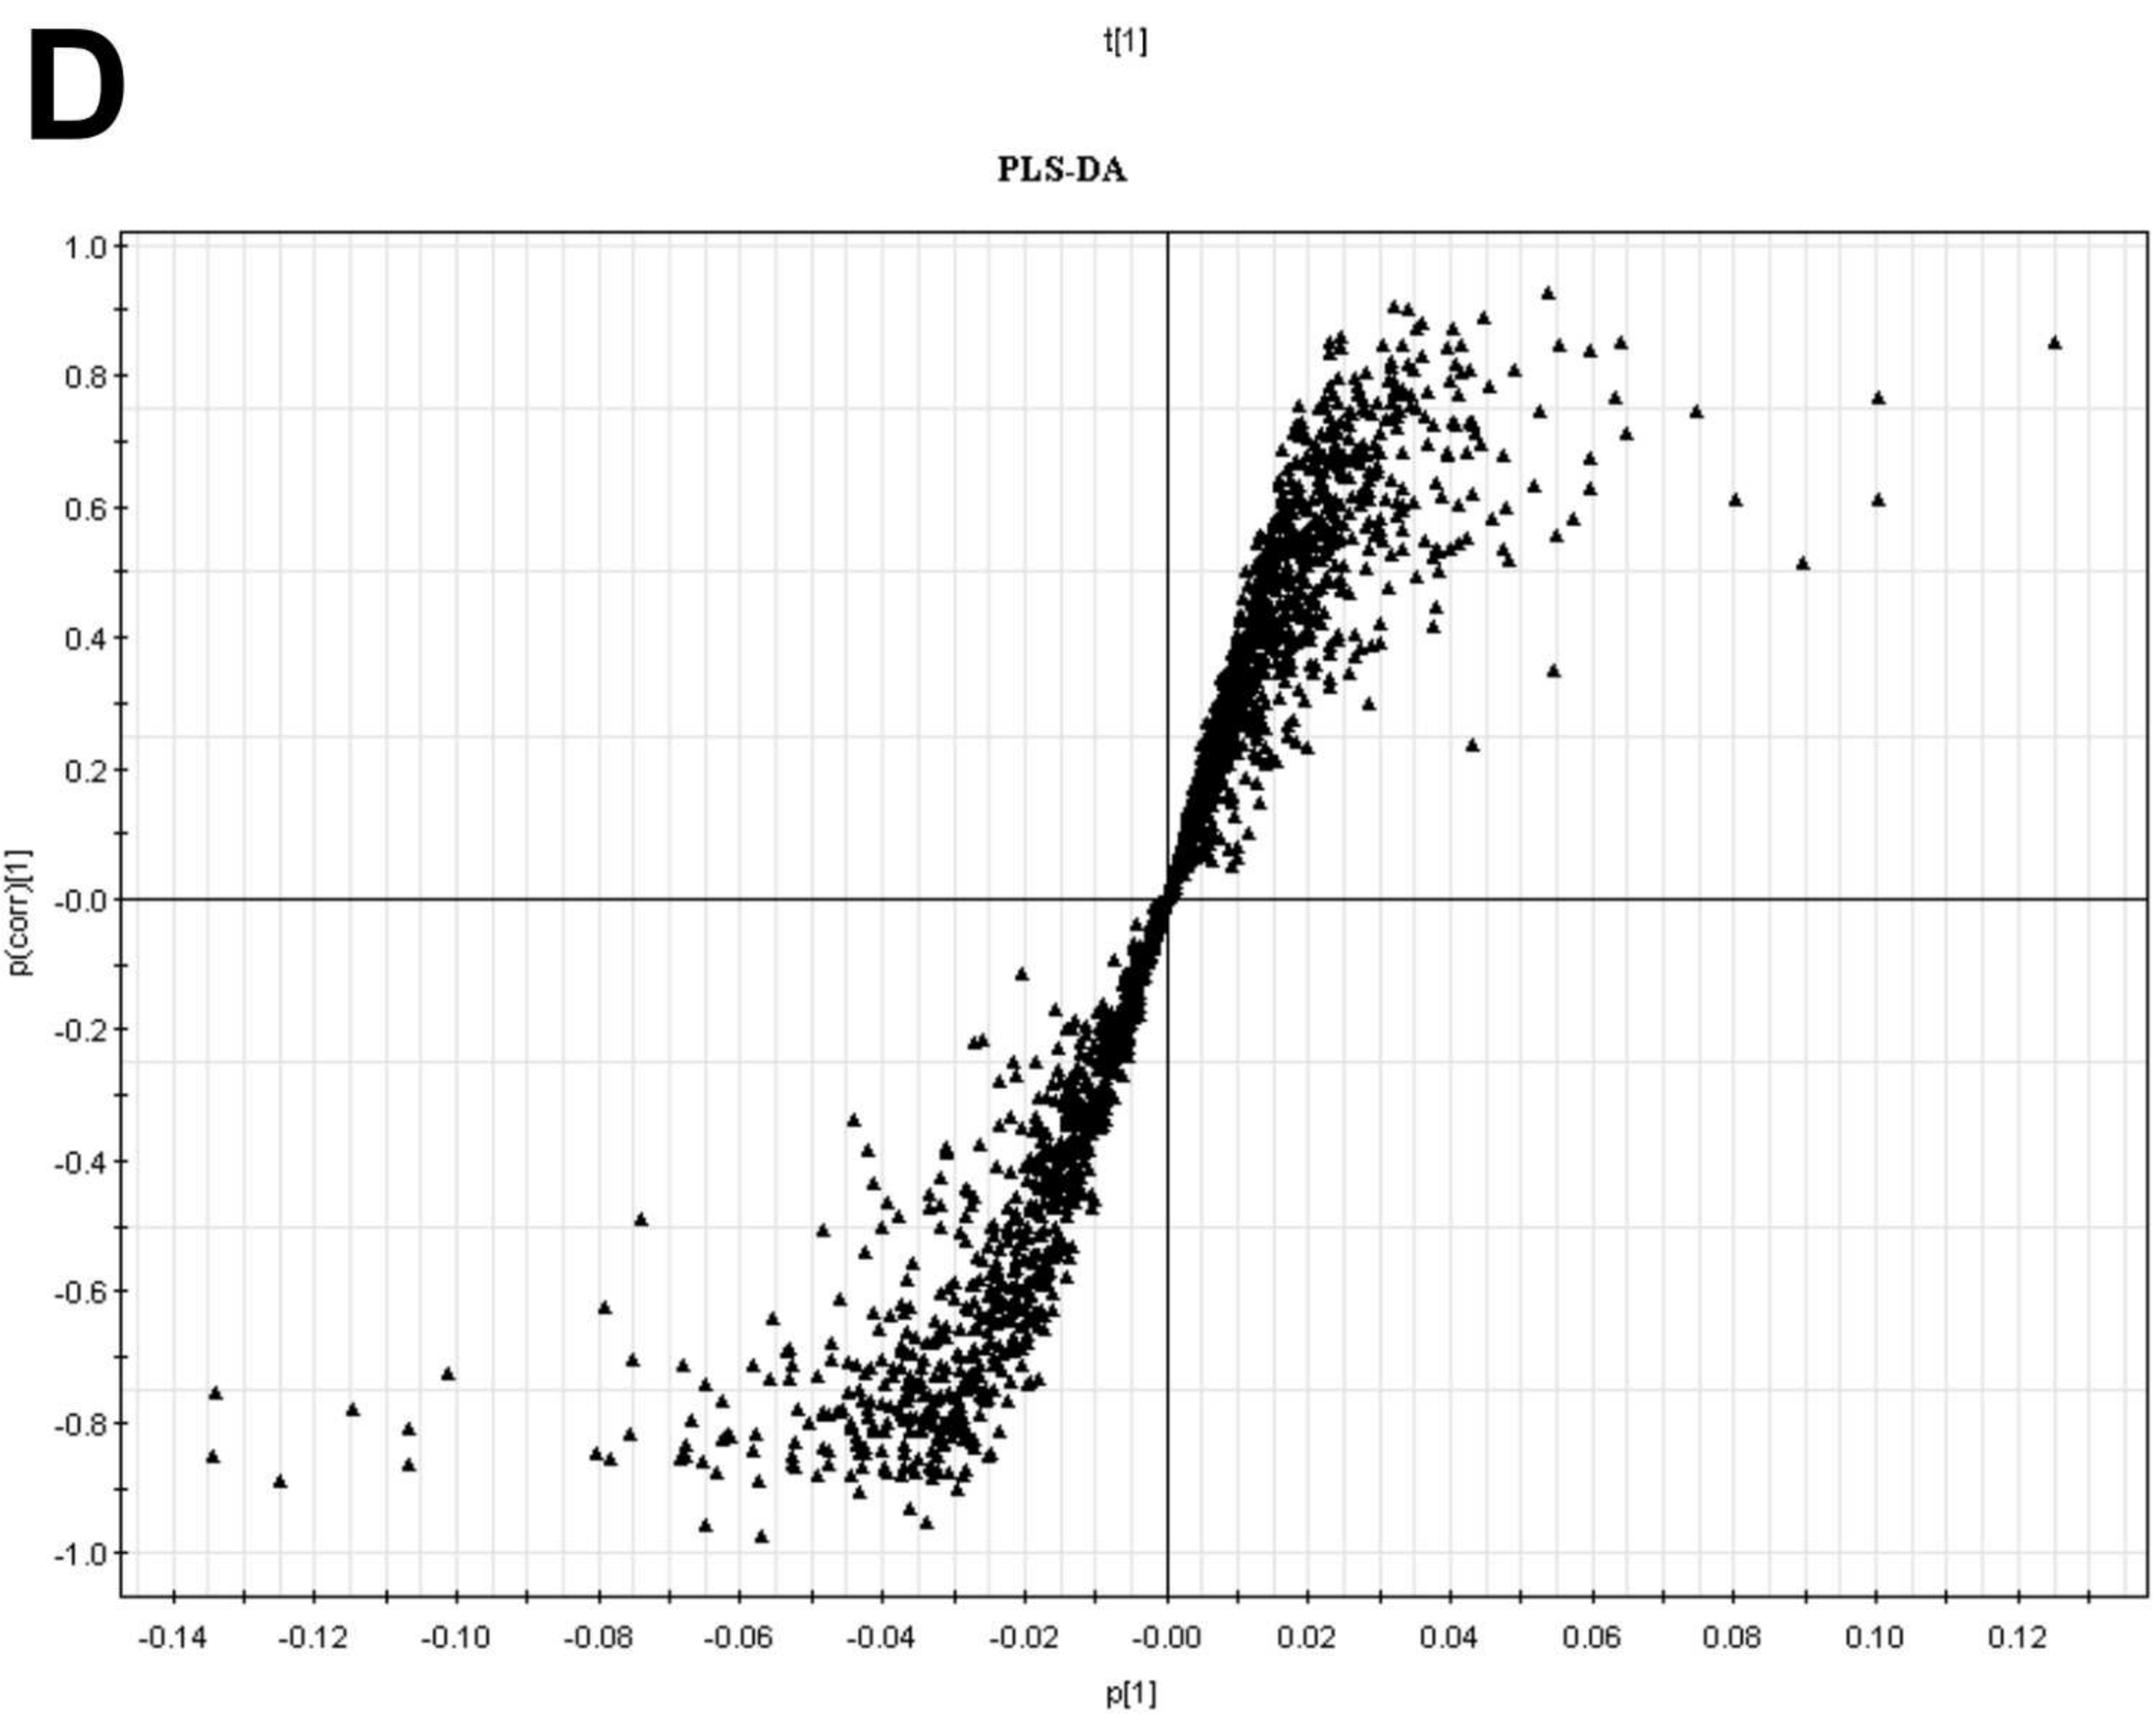

**Table S1.** Potential biomarkers in FFJQC treatment for glyoxylate-induced crystal kidney injury, and their metabolic pathways.

| No. | RT(min) | m/z     | Ion                 | Formula  | Identification  | Oxalate /Saline |             | FFJQC/ Oxalate |             | Related pathway                             |
|-----|---------|---------|---------------------|----------|-----------------|-----------------|-------------|----------------|-------------|---------------------------------------------|
|     |         |         |                     |          |                 | P value         | Fold change | P value        | Fold change |                                             |
| 1   | 0.65    | 179.057 | [M-H] <sup>-</sup>  | C6H12O6  | D-Glucose       | 0.005           | 0.72        | 1.000          | 1.02        | Glycolysis                                  |
| 2   | 0.67    | 140.068 | [M+Na] <sup>+</sup> | C5H11NO2 | L-Valine        | 0.003           | 0.53        | 0.946          | 1.22        | Valine, leucine and isoleucine degradation  |
| 3   | 0.67    | 162.112 | [M+H] <sup>+</sup>  | C7H15NO3 | L-Carnitine     | <0.001          | 0.41        | 1.000          | 1.15        | Bile secretion                              |
| 4   | 0.68    | 132.029 | [M-H] <sup>-</sup>  | C4H7NO4  | L-Aspartic acid | 0.016           | 1.44        | 0.010          | 0.68        | Alanine, aspartate and glutamate metabolism |
| 5   | 0.70    | 157.036 | [M-H] <sup>-</sup>  | C4H6N4O3 | Allantoin       | 0.004           | 1.48        | 0.018          | 0.73        | Purine metabolism                           |
| 6   | 0.99    | 135.031 | [M-H] <sup>-</sup>  | C5H4N4O  | Hypoxanthine    | <0.001          | 0.16        | 0.002          | 4.84        | Purine metabolism                           |
| 7   |         | 137.046 | [M+H] <sup>+</sup>  |          |                 |                 |             |                |             |                                             |
| 8   | 0.99    | 153.041 | [M+H] <sup>+</sup>  | C5H4N4O2 | Xanthine        | 0.030           | 0.42        | 0.003          | 2.92        | Purine metabolism                           |
|     | 0.99    | 169.036 | [M+H] <sup>+</sup>  | C5H4N4O3 | Uric acid       | <0.001          | 3.72        | 0.009          | 0.54        | Purine metabolism                           |

|    |      |         |                       |                 |                         |        |      |       |       |                                                     |
|----|------|---------|-----------------------|-----------------|-------------------------|--------|------|-------|-------|-----------------------------------------------------|
| 9  | 0.99 | 381.03  | [M-H]-                | C16H14O9S       | hesperetin 3'-O-sulfate | <0.001 | 2.30 | 0.092 | 0.79  |                                                     |
| 10 | 0.99 | 151.023 | [M+FA-H] <sup>-</sup> | C3H6O4          | Glyceric acid           | <0.001 | 0.27 | 0.002 | 3.02  | Glycerolipid metabolism                             |
| 11 | 1.00 | 173.01  | [M-H]-                | C6H6O6          | cis-Aconitic acid       | 0.003  | 1.36 | 0.325 | 0.89  | Citrate cycle                                       |
| 12 | 1.04 | 180.067 | [M-H]-                | C9H11NO3        | L-Tyrosine              | <0.001 | 0.52 | 0.243 | 1.30  | Phenylalanine, tyrosine and tryptophan biosynthesis |
| 13 | 1.07 | 129.02  | [M-H]-                | C5H6O4          | Glutaconic acid         | 0.001  | 1.45 | 0.971 | 0.93  | Fatty acid metabolism                               |
| 14 | 1.08 | 189.041 | [M-H]-                | C7H10O6         | 3-Dehydroquinate        | 0.023  | 1.34 | 0.045 | 0.77  | Phenylalanine, tyrosine and tryptophan biosynthesis |
| 15 | 1.10 | 242.096 | [M-H]-                | C10H17N3O2<br>S | Biotin amide            | <0.001 | 0.43 | 1.000 | 1.04  |                                                     |
| 16 | 1.11 | 115.004 | [M-H]-                | C4H4O4          | Fumaric acid            | 0.010  | 1.68 | 1.000 | 0.68  | Citrate cycle                                       |
| 17 | 1.13 | 130.087 | [M-H]-                | C6H13NO2        | L-Isoleucine            | <0.001 | 0.50 | 1.000 | 1.05  | Valine, leucine and isoleucine degradation          |
| 18 | 1.13 | 117.019 | [M-H]-                | C4H6O4          | Succinic acid           | 0.040  | 1.47 | 0.098 | 0.73  | Citrate cycle                                       |
| 19 | 1.13 | 267.075 | [M-H]-                | C10H12N4O5      | Inosine                 | <0.001 | 0.03 | 0.008 | 21.04 | Purine metabolism                                   |
| 20 |      | 269.088 | [M+H] <sup>+</sup>    |                 |                         |        |      |       |       |                                                     |
| 21 | 1.14 | 352.053 | [M+FA-H] <sup>-</sup> | C9H14N3O7P      | dCMP                    | <0.001 | 0.23 | 0.024 | 2.98  | Pyrimidine metabolism                               |

|    |      |         |                       |            |                        |        |      |       |      |                                                     |
|----|------|---------|-----------------------|------------|------------------------|--------|------|-------|------|-----------------------------------------------------|
|    | 1.18 | 229.068 | [M+FA-H] <sup>-</sup> | C5H15NO4P  | Phosphorylcholine      | <0.001 | 7.17 | 0.305 | 0.89 | Glycerophospholipid metabolism                      |
| 22 | 3.66 | 203.084 | [M-H] <sup>-</sup>    | C11H12N2O2 | L-Tryptophan           | 0.004  | 0.66 | 1.000 | 1.06 | Phenylalanine, tyrosine and tryptophan biosynthesis |
| 23 | 3.67 | 261.042 | [M-H] <sup>-</sup>    | C6H15O9P   | Sorbitol-6-phosphate   | <0.001 | 0.42 | 1.000 | 1.06 | Fructose and mannose metabolism                     |
| 24 | 4.23 | 228.088 | [M+FA-H] <sup>-</sup> | C9H13NO3   | Epinephrine            | <0.001 | 3.24 | 0.271 | 0.86 | Tyrosine metabolism                                 |
| 25 | 5.81 | 187.008 | [M-H] <sup>-</sup>    | C7H8O4S    | p-Cresol sulfate       | 0.048  | 1.89 | 0.017 | 0.42 | Degradation of aromatic compounds                   |
| 26 | 6.27 | 206.081 | [M+H] <sup>+</sup>    | C11H11NO3  | Indolelactic acid      | 0.004  | 1.58 | 0.007 | 0.66 | Tryptophan metabolism                               |
| 27 |      | 204.067 | [M-H] <sup>-</sup>    |            |                        |        |      |       |      |                                                     |
| 28 | 6.33 | 247.107 | [M+H] <sup>+</sup>    | C13H14N2O3 | N-acetyltryptophan     | 0.017  | 1.71 | 0.034 | 0.63 | Tryptophan metabolism                               |
|    |      | 245.094 | [M-H] <sup>-</sup>    |            |                        |        |      |       |      |                                                     |
| 29 | 7.35 | 199.098 | [M-H] <sup>-</sup>    | C10H16O4   | cis-4-Decenedioic acid | <0.001 | 5.58 | 0.110 | 0.65 | Oxidation of fatty acids                            |
|    | 7.55 | 159.102 | [M-H] <sup>-</sup>    | C8H16O3    | Hydroxyoctanoic acid   | <0.001 | 2.81 | 1.000 | 0.89 | Fatty acid metabolism                               |
| 30 | 7.58 | 201.114 | [M-H] <sup>-</sup>    | C10H18O4   | Sebacic acid           | 0.006  | 6.81 | 0.410 | 0.64 | Fatty acid metabolism                               |
| 31 | 9.19 | 185.117 | [M-H] <sup>-</sup>    | C10H18O3   | 3-Oxodecanoic acid     | 0.004  | 2.51 | 0.029 | 0.54 | Pyrimidine metabolism                               |
| 32 | 9.76 | 187.133 | [M-H] <sup>-</sup>    | C10H20O3   | 3-Hydroxycapric acid   | <0.001 | 2.93 | 1.000 | 0.92 | Oxidation of fatty acids                            |

|    |       |         |                       |            |                                 |        |      |       |      |                                |
|----|-------|---------|-----------------------|------------|---------------------------------|--------|------|-------|------|--------------------------------|
| 33 | 10.02 | 353.235 | [M-H] <sup>-</sup>    | C20H34O5   | 11b-PGF2a                       | 0.004  | 1.96 | 0.401 | 0.80 | Arachidonic acid metabolism    |
| 34 | 10.33 | 344.28  | [M+H] <sup>+</sup>    | C19H37NO4  | Dodecanoylcarnitine             | <0.001 | 4.11 | 0.658 | 0.81 | Fatty acid metabolism          |
| 35 | 10.65 | 353.235 | [M-H] <sup>-</sup>    | C20H34O5   | Prostaglandin F2a               | <0.001 | 3.95 | 0.015 | 0.61 | Arachidonic acid metabolism    |
| 36 | 10.87 | 370.295 | [M+H] <sup>+</sup>    | C21H39NO4  | cis-5-Tetradecenoylcarnitine    | <0.001 | 6.76 | 1.000 | 0.87 | Fatty acid metabolism          |
| 37 | 11.20 | 396.311 | [M+H] <sup>+</sup>    | C23H41NO4  | 9,12-Hexadecadienoylcarnitine   | <0.001 | 9.40 | 0.514 | 0.78 | Fatty acid metabolism          |
| 38 | 11.44 | 372.311 | [M+H] <sup>+</sup>    | C21H41NO4  | Tetradecanoylcarnitine          | <0.001 | 4.72 | 0.366 | 0.75 | Fatty acid metabolism          |
| 39 | 11.52 | 302.305 | [M+H] <sup>+</sup>    | C18H39NO2  | Sphinganine                     | 0.029  | 1.67 | 0.016 | 0.56 | Sphingolipid metabolism        |
| 40 | 11.65 | 215.166 | [M-H] <sup>-</sup>    | C12H24O3   | 3-Hydroxydodecanoic acid        | <0.001 | 2.93 | 1.000 | 0.98 | Fatty acid metabolism          |
| 41 | 11.79 | 398.326 | [M+H] <sup>+</sup>    | C23H43NO4  | trans-Hexadec-2-enoylcarnitine  | <0.001 | 6.53 | 0.959 | 0.83 | Fatty acid metabolism          |
| 42 | 11.94 | 586.316 | [M+FA-H] <sup>-</sup> | C28H48NO7P | LysoPC(20:5(5Z,8Z,11Z,14Z,17Z)) | 0.023  | 0.42 | 0.287 | 1.79 | Glycerophospholipid metabolism |
| 43 | 12.12 | 424.342 | [M+H] <sup>+</sup>    | C25H45NO4  | Linoleyl carnitine              | 0.001  | 4.00 | 1.000 | 0.89 | Fatty acid metabolism          |
| 44 | 12.43 | 482.324 | [M+H] <sup>+</sup>    | C23H48NO7P | LysoPE(0:0/18:0)                | 0.049  | 1.41 | 1.000 | 0.92 | Glycerophospholipid metabolism |
| 45 | 12.48 | 400.342 | [M+H] <sup>+</sup>    | C23H45NO4  | L-Palmitoylcarnitine            | 0.001  | 2.94 | 0.556 | 0.81 | Fatty acid metabolism          |

|    |       |         |                       |            |                            |        |      |       |      |                                |
|----|-------|---------|-----------------------|------------|----------------------------|--------|------|-------|------|--------------------------------|
| 46 | 12.54 | 526.293 | [M+H] <sup>+</sup>    | C27H44NO7P | LysoPE(22:6/0:0)           | 0.022  | 3.22 | 0.331 | 0.62 | Glycerophospholipid metabolism |
| 47 | 12.71 | 241.182 | [M-H] <sup>-</sup>    | C14H26O3   | 3-Oxotetradecanoic acid    | <0.001 | 6.67 | 1.000 | 0.97 | Fatty acid metabolism          |
| 48 | 12.75 | 426.358 | [M+H] <sup>+</sup>    | C25H47NO4  | Octadecenylcarnitine       | <0.001 | 4.01 | 0.581 | 0.82 | Fatty acid metabolism          |
| 49 | 12.79 | 335.224 | [M-H] <sup>-</sup>    | C20H32O4   | Leukotriene B4             | 0.046  | 1.55 | 1.000 | 0.96 | Arachidonic acid metabolism    |
| 50 | 12.99 | 526.295 | [M-H] <sup>-</sup>    | C27H46NO7P | LysoPE(22:5/0:0)           | 0.001  | 1.66 | 0.110 | 0.81 | Glycerophospholipid metabolism |
| 51 | 13.06 | 454.293 | [M+H] <sup>+</sup>    | C21H44NO7P | LysoPE(0:0/16:0)           | 0.019  | 1.59 | 1.000 | 0.89 | Glycerophospholipid metabolism |
| 52 | 13.07 | 317.214 | [M-H] <sup>-</sup>    | C20H30O3   | 5-Oxoeicosatetraenoic acid | 0.001  | 2.44 | 1.000 | 0.91 | Arachidonic acid metabolism    |
| 53 | 13.10 | 812.546 | [M-H] <sup>-</sup>    | C44H80NO10 | PS(20:3/18:0)              | 0.001  | 2.35 | 1.000 | 0.88 | Glycerophospholipid metabolism |
|    |       |         |                       | P          |                            |        |      |       |      |                                |
| 54 | 13.40 | 243.197 | [M-H] <sup>-</sup>    | C14H28O3   | 2-Hydroxymyristic acid     | <0.001 | 2.83 | 1.000 | 0.95 |                                |
| 55 | 13.46 | 428.373 | [M+H] <sup>+</sup>    | C25H49NO4  | Stearoylcarnitine          | 0.022  | 1.96 | 1.000 | 0.87 | Fatty acid metabolism          |
| 56 | 13.54 | 522.357 | [M+H] <sup>+</sup>    | C26H52NO7P | LysoPC(18:1(9Z))           | 0.030  | 1.49 | 1.000 | 0.97 | Glycerophospholipid metabolism |
| 57 | 13.72 | 379.206 | [M+FA-H] <sup>-</sup> | C20H30O4   | Delta-12-Prostaglandin J2  | 0.001  | 2.57 | 0.238 | 0.77 | Arachidonic acid metabolism    |
| 58 | 13.72 | 864.578 | [M-H] <sup>-</sup>    | C48H84NO10 | PE(MonoMe(9,5)/DiMe(1      | <0.001 | 2.85 | 0.037 | 0.74 | Glycerophospholipid metabolism |
|    |       |         |                       | P          | 3,5))                      |        |      |       |      |                                |
| 59 | 13.72 | 343.23  | [M-H] <sup>-</sup>    | C22H32O    | 4-Hydroxy-docosahexaeno    | 0.001  | 2.69 | 0.517 | 0.82 | Oxidation of fatty acids       |
|    |       |         |                       |            | ic acid                    |        |      |       |      |                                |



|    |       |         |                     |            |                                  |        |      |       |      |                                         |
|----|-------|---------|---------------------|------------|----------------------------------|--------|------|-------|------|-----------------------------------------|
| 60 | 13.77 | 616.363 | [M-H]-              | C32H51N5O7 | Neuromedin N                     | 0.008  | 0.63 | 1.000 | 1.14 |                                         |
| 61 | 13.81 | 343.225 | [M+Na] <sup>+</sup> | C20H32O3   | 8,9-Epoxyeicosatrienoic acid     | 0.017  | 1.77 | 1.000 | 0.86 | arachidonic acid                        |
| 62 | 13.82 | 319.231 | [M-H]-              | C20H32O3   | 12-hydroxyeicosatetraenoic acid  | 0.013  | 1.65 | 1.000 | 0.93 | Arachidonic acid metabolism             |
| 63 | 13.82 | 377.189 | [M-H]-              | C17H26N6O4 | Pentosidine                      | 0.015  | 1.50 | 1.000 | 0.91 |                                         |
| 64 | 13.82 | 301.219 | [M-H]-              | C20H30O2   | Eicosapentaenoic acid            | 0.006  | 1.69 | 1.000 | 0.93 | Biosynthesis of unsaturated fatty acids |
| 65 | 13.87 | 510.356 | [M+H] <sup>+</sup>  | C25H52NO7P | LysoPC(17:0)                     | 0.018  | 1.61 | 0.926 | 0.87 | Glycerophospholipid metabolism          |
| 66 | 13.91 | 508.376 | [M+H] <sup>+</sup>  | C26H54NO6P | LysoPC(P-18:0)                   | 0.025  | 1.78 | 0.678 | 0.82 | Glycerophospholipid metabolism          |
| 67 | 14.08 | 317.214 | [M-H]-              | C20H30O3   | 12-Oxoecicosatetraenoic acid     | 0.042  | 1.91 | 1.000 | 0.86 | Arachidonic acid metabolism             |
| 68 | 14.17 | 305.247 | [M+H] <sup>+</sup>  | C20H32O2   | Arachidonic acid                 | <0.001 | 3.45 | 0.257 | 0.75 | Arachidonic acid metabolism             |
| 69 | 14.17 | 321.245 | [M-H]-              | C20H34O3   | 15(S)-Hydroxyeicosatrienoic acid | 0.001  | 2.88 | 0.394 | 0.78 | Arachidonic acid metabolism             |
| 70 | 14.61 | 1047.74 | [M+Na] <sup>+</sup> | C69H100O6  | TG(22:5/22:6)                    | 0.007  | 1.97 | 1.000 | 0.87 | Fatty acid metabolism                   |
| 71 | 15.66 | 271.229 | [M-H]-              | C16H32O3   | 3-hydroxyhexadecanoic acid       | <0.001 | 2.49 | 0.048 | 0.87 | Fatty acid metabolism                   |

|    |       |         |                    |            | acid                 |        |      |       |      |                                         |
|----|-------|---------|--------------------|------------|----------------------|--------|------|-------|------|-----------------------------------------|
| 72 | 16.07 | 719.535 | [M-H]-             | C37H75N2O6 | SM(d18:1/14:0)       | 0.005  | 0.44 | 1.000 | 1.14 | Sphingolipid metabolism                 |
|    |       |         |                    | P          |                      |        |      |       |      |                                         |
| 73 | 16.11 | 253.218 | [M-H]-             | C16H30O2   | Palmitoleic acid     | <0.001 | 3.94 | 0.480 | 0.81 | Fatty acid metabolism                   |
| 74 | 16.17 | 363.211 | [M-H]-             | C21H32O5   | Tetrahydrocortisone  | 0.004  | 3.04 | 1.000 | 0.91 | Steroid hormone biosynthesis            |
| 75 | 16.17 | 329.248 | [M+H] <sup>+</sup> | C22H32O2   | Docosahexaenoic acid | 0.001  | 2.06 | 1.000 | 0.91 | Biosynthesis of unsaturated fatty acids |
| 76 | 16.50 | 398.134 | [M-H]-             | C15H23N6O5 | S-Adenosylmethionine | <0.001 | 0.39 | 1.000 | 1.01 | Cysteine and methionine metabolism      |
|    |       |         |                    | S          |                      |        |      |       |      |                                         |
| 77 | 16.51 | 279.235 | [M-H]-             | C18H32O2   | linoleic acid        | 0.004  | 1.78 | 0.482 | 0.89 | Fatty acid metabolism                   |
| 78 | 17.16 | 255.235 | [M-H]-             | C16H32O    | Palmitic acid        | <0.001 | 2.76 | 1.000 | 0.98 | Fatty acid metabolism                   |
| 79 | 17.39 | 281.251 | [M-H]-             | C18H34O2   | Oleic acid           | <0.001 | 2.64 | 0.211 | 0.81 | Fatty acid metabolism                   |
| 80 | 18.35 | 283.265 | [M-H]-             | C18H36O2   | Stearic acid         | 0.004  | 1.63 | 1.000 | 0.97 | Fatty acid metabolism                   |
| 81 | 18.48 | 309.281 | [M-H]-             | C20H38O2   | Eicosenoic acid      | 0.009  | 1.78 | 1.000 | 0.88 | Biosynthesis of unsaturated fatty acids |

---

FFJQC, Fu-Fang-Jin-Qian-Chao; SM, Sphingomyelin; PE, phosphatidyl ethanolamine; PC, phosphatidylcholine; LysoPE, lysophosphatidyl ethanolamine; LysoPC, lysophosphatidylcholine; dCMP stands for deoxycytidine monophosphate
